# Supplementary material for: Predictive value of autoantibodies from anti-CCP2, anti-MCV and anti-human citrullinated fibrinogen tests, in early rheumatoid arthritis patients with rapid radiographic progression at 1 year: results from the ESPOIR cohort
Source: HighWire-hosted journal article supplement (doi:10.1136/rmdopen-2015-000180), 2015-11-01
Supplement: rmdopen-2015-000180supp_table5.pdf [file rmdopen-2015-000180supp_table5.pdf]

**SUPPLEMENTARY DATA**

**Supplementary Table S5. Multivariate analysis of variables associated with 1-year RRP**

|                                                                                                                                         | <b>OR</b>                            | <b>95%CI</b> | <b>p value</b> |
|-----------------------------------------------------------------------------------------------------------------------------------------|--------------------------------------|--------------|----------------|
| <b>Model 1: assessing anti-CCP2 (positive &gt; 50 U/mL)<br/>AUC 0.6496 (95%CI 0.5981–0.7010)</b>                                        |                                      |              |                |
| <b>Anti-CCP2 positivity</b>                                                                                                             | 2.16                                 | 1.44–3.23    | < 0.001        |
| <b>CRP level (&gt; 10 mg/L)</b>                                                                                                         | 1.71                                 | 1.15–2.56    | 0.008          |
| <b>Erosions at baseline</b>                                                                                                             | 1.50                                 | 1.00–2.25    | 0.048          |
| <b>Model 1: assessing anti-CCP2 (positive &gt; 40 U/mL <i>i.e.</i> 98% diagnostic specificity)<br/>AUC 0.6496 (95%CI 0.5979–0.7003)</b> |                                      |              |                |
| <b>Anti-CCP2 positivity</b>                                                                                                             | 2.16                                 | 1.44–3.23    | < 0.001        |
| <b>CRP level (&gt; 10 mg/L)</b>                                                                                                         | 1.71                                 | 1.15–2.56    | 0.008          |
| <b>Erosions at baseline</b>                                                                                                             | 1.50                                 | 1.00–2.25    | 0.048          |
| <b>Model 2: assessing anti-MCV (positive &gt; 35 UA/mL <i>i.e.</i> 98% diagnostic specificity)<br/>AUC 0. (95%CI 0.–0.)</b>             |                                      |              |                |
| <b>Anti-MCV positivity</b>                                                                                                              | Discarded during logistic regression |              |                |
| <b>RF positivity</b>                                                                                                                    | 2.12                                 | 1.40–3.20    | < 0.001        |
| <b>CRP level (&gt; 10 mg/L)</b>                                                                                                         | 1.80                                 | 1.21–2.67    | 0.004          |
| <b>Model 3: assessing AhFibA (positive &gt; 0.119 AU <i>i.e.</i> 98% diagnostic specificity)<br/>AUC 0.6304 (95%CI 0.5784–0.6825)</b>   |                                      |              |                |
| <b>AhFibA positivity</b>                                                                                                                | Discarded during logistic regression |              |                |
| <b>RF positivity</b>                                                                                                                    | 2.12                                 | 1.40–3.20    | < 0.001        |
| <b>CRP level (&gt; 10 mg/L)</b>                                                                                                         | 1.80                                 | 1.21–2.67    | 0.004          |
| <b>Model 4: assessing high ACPA titer (&gt;3N ; threshold 98% diagnostic specificity)<br/>AUC 0.6457 (95%CI 0.5936–0.6978)</b>          |                                      |              |                |
| <b>High anti-CCP2 or AhFibA titers</b>                                                                                                  | Discarded during logistic regression |              |                |
| <b>High anti-MCV titers</b>                                                                                                             | 2.14                                 | 1.43–3.19    | < 0.001        |

|                                 |      |           |       |
|---------------------------------|------|-----------|-------|
| <b>CRP level (&gt; 10 mg/L)</b> | 1.70 | 1.14–2.53 | 0.010 |
| <b>Erosions at baseline</b>     | 1.52 | 1.01–2.28 | 0.043 |

---

*AUC = area under the receiver operating characteristic curve. Models included baseline ACPA status, age, erosive status, CRP level and RF status. All multivariate models, whatever the positivity thresholds were, had similar AUC.*
